# Supplementary material for: Indocyanine green-functionalized bottle brushes of poly(2-oxazoline) on cellulose nanocrystals for photothermal cancer therapy
Source: Royal Society of Chemistry journal article supplement (doi:10.1039/c7tb00812k), 2017-01-01
Supplement: c7tb00812k1.pdf [file c7tb00812k1.pdf]

*Electronic Supplementary Information (ESI) for:*

**Indocyanine Green-Functionalized Bottle Brushes of Poly(2-oxazoline) on Cellulose Nanocrystals for Photothermal Cancer Therapy**

Liman Hou,<sup>a,d</sup> Jianyong Fang,<sup>b</sup> Weiqi Wang,<sup>c</sup> Zhigang Xie,<sup>c</sup> Dewen Dong<sup>a,b</sup> and Ning Zhang<sup>a,b\*</sup>

<sup>a</sup> Key Laboratory of Synthetic Rubber, Changchun Institute of Applied Chemistry, Chinese Academy of Sciences, Changchun 130022, People's Republic of China, Fax: +86-431-85262740, \*E-mail: ning.zhang@ciac.ac.cn

<sup>b</sup> Changzhou Institute of Energy Storage Materials & Devices, Changzhou, 213000, P. R. China

<sup>c</sup> State Key Laboratory of Polymer Physics and Chemistry Changchun Institute of Applied Chemistry, Chinese Academy of Sciences, Changchun 130022, People's Republic of China

<sup>d</sup> University of the Chinese Academy of Sciences, Beijing 100864, P. R. China

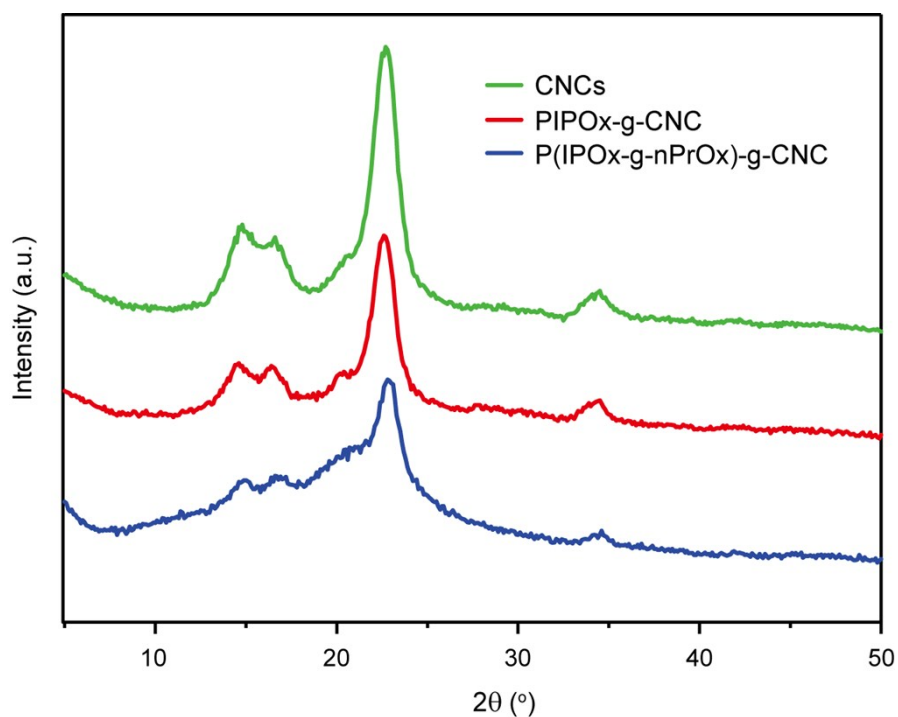

Fig. S1 X-ray diffractograms of nonmodified CNCs and polymer modified CNCs.

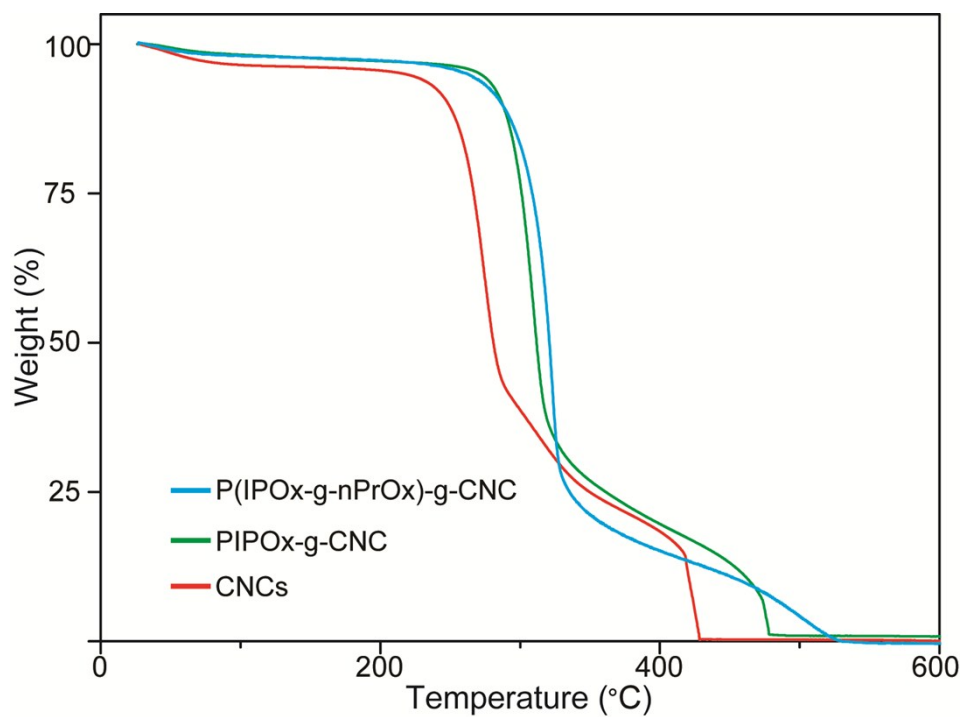

Fig. S2 Thermogravimetric analysis curves for CNCs, PIPOx-g-CNC, P(IPOx-g-nPrOx)-g-CNC.

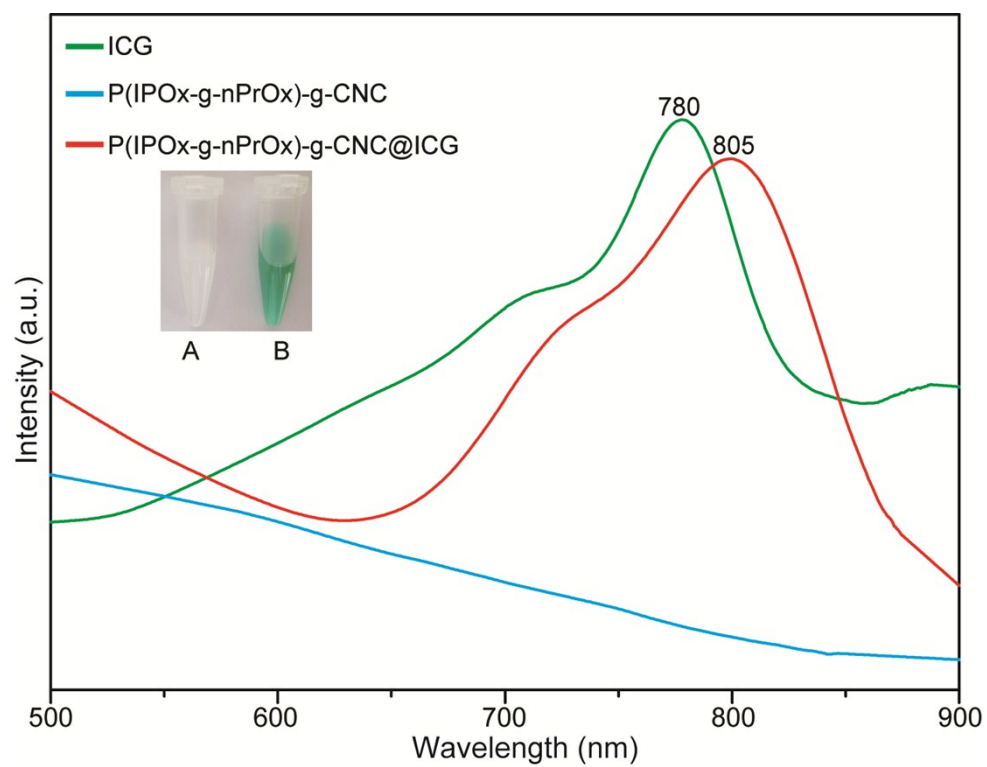

Fig. S3 UV-Vis-NIR spectra of ICG, P(IPOx-g-nPrOx)-g-CNC and P(IPOx-g-nPrOx)-g-CNC@ICG in water. Insets: optical photograph of (A) CNCs, (B) P(IPOx-g-nPrOx)-g-CNC@ICG.

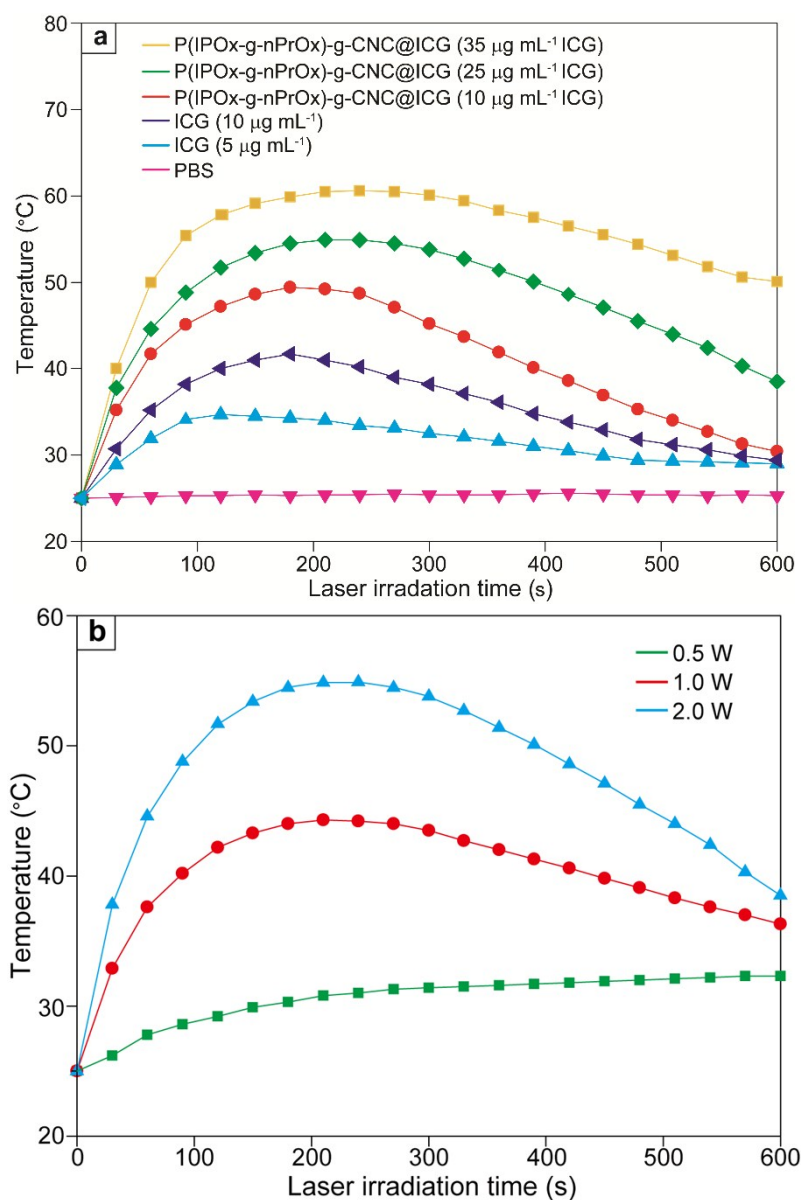

Fig. S4 (a) Temperature elevation of PBS, ICG and P(IPOx-g-nPrOx)-g-CNC@ICG aqueous solutions with various ICG concentrations as a function of time under irradiation with an 808 nm NIR laser at a power of 2.0 W/cm<sup>2</sup>. (b) Temperature elevation of P(IPOx-g-nPrOx)-g-CNC@ICG aqueous solution at ICG concentrations of 25 g/mL under different powers as a function of time.
